# Supplementary material for: Presence of the Human Cytomegalovirus in Glioblastomas—A Systematic Review
Source: MDPI journal article supplement (doi:10.3390/cancers13205051), 2021-10-09
Supplement: s1 [file s1]

# Supplementary Materials: Presence of the Human Cytomegalovirus in Glioblastomas—A systematic review

Inti Peredo-Harvey, Afsar Rahbar and Cecilia Söderberg-Nauclér

|                                                                                                                                                                                                                                                                                                                                                                                                                                        |                                                                                                                                                                                                                                                                                                                            |
|----------------------------------------------------------------------------------------------------------------------------------------------------------------------------------------------------------------------------------------------------------------------------------------------------------------------------------------------------------------------------------------------------------------------------------------|----------------------------------------------------------------------------------------------------------------------------------------------------------------------------------------------------------------------------------------------------------------------------------------------------------------------------|
| <p>Interface: Ovid</p> <p>Date of Search: 31 August 2021</p> <p>Number of hits: 356</p> <p>Comment: In Ovid, two or more words are automatically searched as phrases; i.e. no quotation marks are needed</p>                                                                                                                                                                                                                           | <p>Field labels</p> <ul style="list-style-type: none"> <li>• exp/ = exploded MeSH term</li> <li>• / = non exploded MeSH term</li> <li>• .ti,ab,kf. = title, abstract and author keywords</li> <li>• adjx = adjacent within x words, regardless of order</li> <li>• * = truncation of word for alternate endings</li> </ul> |
| <ol style="list-style-type: none"> <li>1. Glioblastoma/</li> <li>2. Gliosarcoma/</li> <li>3. Glioma/</li> <li>4. (glioblastom* or gliosarcom* or gliom*).ti,ab,kf.</li> <li>5. or/1-4</li> <li>6. Cytomegalovirus/</li> <li>7. (human cytomegalovirus or human herpesvirus 5 or salivary gland virus* or CMV or HCMV or HHV-5).ti,ab,kf.</li> <li>8. or/6-7</li> <li>9. 5 and 8</li> <li>10. 9 not (animals not humans).sh.</li> </ol> |                                                                                                                                                                                                                                                                                                                            |
| <p>Interface: embase.com</p> <p>Date of Search: 31 August 2021</p> <p>Number of hits: 268</p> <p>Comment: Emtree is the controlled vocabulary in Embase</p>                                                                                                                                                                                                                                                                            | <p>Field labels</p> <ul style="list-style-type: none"> <li>• /exp = exploded Emtree term</li> <li>• /de = non exploded Emtree term</li> <li>• ti,ab = title and abstract</li> <li>• NEAR/x = adjacent within x words, regardless of order</li> <li>• * = truncation of word for alternate endings</li> </ul>               |
| <ol style="list-style-type: none"> <li>#1 'glioblastoma'/de</li> <li>#2 'gliosarcoma'/de</li> <li>#3 'glioma'/de</li> </ol>                                                                                                                                                                                                                                                                                                            |                                                                                                                                                                                                                                                                                                                            |

|                                                                                                   |                                                                                                                                                                                                                                            |
|---------------------------------------------------------------------------------------------------|--------------------------------------------------------------------------------------------------------------------------------------------------------------------------------------------------------------------------------------------|
| #4                                                                                                | glioblastom*:ti,ab,kw OR gliosarcom*:ti,ab,kw OR gliom*:ti,ab,kw                                                                                                                                                                           |
| #5                                                                                                | #1 OR #2 OR #3 OR #4                                                                                                                                                                                                                       |
| #6                                                                                                | 'human cytomegalovirus'/exp                                                                                                                                                                                                                |
| #7                                                                                                | 'human cytomegalovirus':ti,ab,kw OR 'human herpesvirus 5':ti,ab,kw OR 'salivary gland virus':ti,ab,kw OR hcmv:ti,ab,kw OR 'hhv 5':ti,ab,kw                                                                                                 |
| #8                                                                                                | #6 OR #7                                                                                                                                                                                                                                   |
| #9                                                                                                | #5 AND #8                                                                                                                                                                                                                                  |
| #10                                                                                               | #9 NOT ([animals]/lim NOT [humans]/lim)                                                                                                                                                                                                    |
| Interface: Clarivate Analytics                                                                    | Field labels                                                                                                                                                                                                                               |
| Date of Search: 31 August 2021                                                                    | <ul style="list-style-type: none"> <li>• TS/Topic = title, abstract, author keywords and Keywords Plus</li> <li>• NEAR/x = adjacent within x words, regardless of order</li> <li>• * = truncation of word for alternate endings</li> </ul> |
| Number of hits: 353                                                                               |                                                                                                                                                                                                                                            |
| TOPIC: ((glioblastom* or gliosarcom* or gliom*))                                                  |                                                                                                                                                                                                                                            |
| AND                                                                                               |                                                                                                                                                                                                                                            |
| TOPIC: ((human cytomegalovirus or human herpesvirus 5 or salivary gland virus* or HCMV or HHV-5)) |                                                                                                                                                                                                                                            |
| Interface: Google Scholar                                                                         |                                                                                                                                                                                                                                            |
| Date of Search: 2018-2021                                                                         |                                                                                                                                                                                                                                            |
| Number of hits: 51                                                                                |                                                                                                                                                                                                                                            |
| Search: glioblastoma gliosarcoma glioma "human cytomegalovirus" HCMV                              |                                                                                                                                                                                                                                            |

**Figure S1.** Illustration of the use of Boolean operators as support tools for the refinement process of the data search in MEDLINE (Ovid), Embase (Embase.com), and Web of Science until August 2021 and Google Scholar 2018 to 2021.

**Table S1.** Information about all 81 analysed articles.

| # | Author        | Year | Ref. No | Pos/No Pos | Positive Results | n = | Used Techniques for Detection of HCMV |
|---|---------------|------|---------|------------|------------------|-----|---------------------------------------|
| 1 | Wrench et al. | 2001 | 65      | P          | 37               | 56  | ELISA IgG                             |
|   |               |      |         |            | 22               | 22  | IHC IE1-72 (only GMB)                 |
|   |               |      |         |            | 8                | 8   | IHC EA                                |
|   |               |      |         |            | 10               | 10  | IHC pp65                              |
| 2 | Coobs et al.  | 2002 | 2       | P          | 2                | 2   | Immunogold staining pp65              |
|   |               |      |         |            | 8                | 8   | ISH early gene RNA                    |
|   |               |      |         |            | 4                | 4   | ISH total DNA                         |
|   |               |      |         |            | 7                | 9   | Nested-PCR gB                         |
| 3 | Lau et al.    | 2005 | 78      | N          | 0                | 8   | IHC pp65                              |

|    |                        |      |    |   |    |    |                                                  |
|----|------------------------|------|----|---|----|----|--------------------------------------------------|
|    |                        |      |    |   | 0  | 8  | IHC CCH2/PPG9                                    |
|    |                        |      |    |   | 0  | 8  | ISH early gene (RNA)                             |
|    |                        |      |    |   | 0  | 8  | ISH total DNA                                    |
|    |                        |      |    |   | 0  | 8  | PCR gB DNA                                       |
| 4  | Sabatier et al.        | 2005 | 87 | N | 9  | 81 | IHC IE1-72                                       |
|    |                        |      |    |   | 7  | 9  | ISH HCMV DNA                                     |
| 5  | Lehrer et al.          | 2011 | 79 | N | 0  | 5  | Reverse Transcription PCR blood                  |
|    |                        |      |    |   | 0  | 23 | IHC IE1 68-72                                    |
|    |                        |      |    |   | 0  | 23 | IHC EA                                           |
|    |                        |      |    |   | 0  | 23 | IHC pp65                                         |
| 6  | Poltermann et al.      | 2006 | 85 | N | 0  | 24 | Nested PCR IE1                                   |
|    |                        |      |    |   | 0  | 24 | Nested PCR gB                                    |
|    |                        |      |    |   | 0  | 23 | Nested PCR IE1 blood                             |
|    |                        |      |    |   | 0  | 23 | Nested PCR gB blood                              |
|    |                        |      |    |   | 21 | 26 | IF US28                                          |
| 7  | Soroceanu et al.       | 2011 | 60 | P | 6  | 26 | IHC US28                                         |
|    |                        |      |    |   | 18 | 44 | Reverse Transcription PCR US28                   |
|    |                        |      |    |   | 42 | 45 | IHC IE1-72                                       |
|    |                        |      |    |   | 30 | 33 | IHC pp65                                         |
| 8  | Mitchell et al.        | 2008 | 50 | P | 16 | 16 | ISH HCMV DNA (whole DNA)                         |
|    |                        |      |    |   | 21 | 34 | Real time PCR IE1 (UL123)                        |
|    |                        |      |    |   | 8  | 34 | Real time PCR gB (UL55)                          |
|    |                        |      |    |   | 16 | 20 | Nested PCR gB blood                              |
|    |                        |      |    |   | 21 | 21 | IHC IE1-72                                       |
| 9  | Scheurer et al.        | 2008 | 56 | P | 21 | 21 | ISH HCMV DNA Early                               |
| 10 | Slinger et al.         | 2010 | 59 | P | 20 | 21 | IHC IEA                                          |
|    |                        |      |    |   | 20 | 21 | IHC US 28                                        |
| 11 | Lucas et al.           | 2011 | 46 | P | 25 | 49 | IHC pp65                                         |
|    |                        |      |    |   | 8  | 49 | IHC IE1 68-72                                    |
| 12 | Dziurzynski et al.     | 2011 | 32 | P | 5  | 5  | Flow cytometry analysis<br>pp65 specific T-cells |
| 13 | Sjöström et al.        | 2011 | 58 | P | 53 | 61 | ELISA, IgG                                       |
|    |                        |      |    |   | 11 | 11 | Nested PCR DNA                                   |
|    |                        |      |    |   | 6  | 6  | Real time PCR UL123 GBM                          |
| 14 | Bhattacharjee * et al. | 2012 | 25 | P | 9  | 12 | WB IE1                                           |
|    |                        |      |    |   | 9  | 12 | WB pp65                                          |
|    |                        |      |    |   | 3  | 3  | WB gB                                            |
| 15 | Fonseca et al.         | 2012 | 33 | P | 6  | 18 | PCR pp65                                         |
|    |                        |      |    |   | 5  | 5  | PCR gB (UL55)                                    |
|    |                        |      |    |   | 5  | 5  | qPCR gB (UL55)                                   |
|    |                        |      |    |   | 5  | 5  | PCRpp71 (UL82)                                   |
|    |                        |      |    |   | 5  | 5  | qPCRpp71 (UL82)                                  |
|    |                        |      |    |   | 8  | 8  | PCR US28                                         |
| 16 | Ranganathan et al.     | 2012 | 55 | P | 8  | 8  | qPCR US28                                        |
|    |                        |      |    |   | 4  | 5  | PCR UL144                                        |
|    |                        |      |    |   | 4  | 5  | qPCR UL144                                       |
|    |                        |      |    |   | 9  | 9  | PCR UL17                                         |
|    |                        |      |    |   | 9  | 9  | qPCR UL17                                        |
|    |                        |      |    |   | 5  | 5  | PCR UL27                                         |

|    |                        |      |    |   |    |     |                                |
|----|------------------------|------|----|---|----|-----|--------------------------------|
|    |                        |      |    |   | 5  | 5   | qPCR UL27                      |
|    |                        |      |    |   | 10 | 10  | PCR UL69                       |
|    |                        |      |    |   | 10 | 10  | qPCR UL69                      |
|    |                        |      |    |   | 12 | 12  | PCR UL96                       |
|    |                        |      |    |   | 12 | 12  | qPCR UL96                      |
|    |                        |      |    |   | 4  | 5   | PCR US2                        |
|    |                        |      |    |   | 4  | 5   | qPCR US2                       |
|    |                        |      |    |   | 9  | 9   | PCR US11                       |
|    |                        |      |    |   | 9  | 9   | qPCR US 11                     |
|    |                        |      |    |   | 12 | 12  | PCR primers frozen             |
| 17 | Ghazi et al.           | 2012 | 36 | P | 10 | 11  | IHC IE1 72                     |
|    |                        |      |    |   | 5  | 11  | IHC pp65                       |
|    |                        |      |    |   | 8  | 9   | ISH CMV DNA                    |
|    |                        |      |    |   | 11 | 11  | IE specific T-cells in blood   |
|    |                        |      |    |   | 11 | 11  | pp65 specific T-cells in blood |
| 18 | Rahbar et al.          | 2012 | 54 | P | 79 | 80  | IHC IEA                        |
|    |                        |      |    |   | 76 | 80  | IHC LA                         |
|    |                        |      |    |   | 6  | 7   | ISH HCMV DNA IEA LA            |
| 19 | Rahbar et al.          | 2013 | 52 | P | 74 | 75  | IHC IEA                        |
|    |                        |      |    |   | 70 | 75  | IHC LA                         |
| 20 | Tang et al.            | 2013 | 93 | N | 19 | 19  | ISH                            |
|    |                        |      |    |   | 0  | 167 | NGS                            |
| 21 | Matlaf et al.          | 2013 | 48 | P | 5  | 10  | IF pp71                        |
|    |                        |      |    |   | 10 | 15  | Rt PCR                         |
|    |                        |      |    |   | 7  | 10  | Real Time PCR pp71             |
|    |                        |      |    |   | 10 | 10  | qPCR pp71                      |
|    |                        |      |    |   | 6  | 10  | ELISA IgG                      |
|    |                        |      |    |   | 2  | 10  | ELISA IgM                      |
|    |                        |      |    |   | 9  | 11  | WB pp71                        |
| 22 | Stragliotto et al.     | 2013 | 19 | P | 42 | 42  | IHC IEA                        |
|    |                        |      |    |   | 42 | 42  | IHC LA                         |
| 23 | Ahani et al.           | 2013 | 21 | P | 12 | 16  | qPCR                           |
| 24 | Cosset et al.          | 2013 | 72 | N | 0  | 20  | Nested PCR                     |
|    |                        |      |    |   | 0  | 20  | Nested PCR E1 E2               |
|    |                        |      |    |   | 14 | 31  | ELISA IgG                      |
|    |                        |      |    |   | 0  | 31  | ELISA IgM                      |
|    |                        |      |    |   | 0  | 20  | NGS Metagenomic analysis       |
| 25 | Garcia-Martinez et al. | 2013 | 74 | N | 1  | 54  | Real Time PCR DNA              |
| 26 | Dos Santos et al.      | 2014 | 31 | P | 20 | 22  | nPCR gB (UL55)                 |
|    |                        |      |    |   | 11 | 20  | nPCR gB blood                  |
|    |                        |      |    |   | 21 | 22  | qPCR pp65                      |
|    |                        |      |    |   | 9  | 20  | qPCR pp65 blood                |
| 27 | Tang et al.            | 2015 | 94 | N | 0  | 34  | NGS DNA                        |
| 28 | Cimino et al.          | 2014 | 71 | N | 0  | 21  | NGS DNA                        |
| 29 | Ding et al.            | 2014 | 29 | P | 16 | 19  | IHC IE1-72 (only GBM)          |
|    |                        |      |    |   | 15 | 19  | IHC pp65 (only GBM)            |
|    |                        |      |    |   | 12 | 19  | Nested PCR gB (UL55)           |
|    |                        |      |    |   | 7  | 19  | Nested PCR gB blood            |
| 30 | Yamashita et al.       | 2014 | 95 | N | 7  | 10  | IHC IE1/2                      |

|    |                   |      |    |   |    |    |                                                            |
|----|-------------------|------|----|---|----|----|------------------------------------------------------------|
|    |                   |      |    |   | 5  | 10 | IHC pp65                                                   |
|    |                   |      |    |   | 10 | 10 | IHC pp28                                                   |
|    |                   |      |    |   | 0  | 10 | FISH DNA                                                   |
|    |                   |      |    |   | 0  | 59 | Real Time PCR gB                                           |
|    |                   |      |    |   | 0  | 59 | qPCR IE                                                    |
|    |                   |      |    |   | 0  | 5  | WB IE1/2 and pp28                                          |
|    |                   |      |    |   | 0  | 10 | IHC UL44                                                   |
| 31 | Solomon et al.    | 2014 | 89 | N | 0  | 68 | IHC CCH2/DDG9                                              |
|    |                   |      |    |   | 55 | 68 | IHC IE Clone 8B1.2                                         |
|    |                   |      |    |   | 0  | 68 | IHC IE Clone 6F8.2                                         |
|    |                   |      |    |   | 55 | 68 | IHC EA Clone QB1/42                                        |
| 32 | Libard et al.     | 2014 | 4  | P | 55 | 68 | IHC EA Clone BM204                                         |
|    |                   |      |    |   | 0  | 68 | IHC LA Clone 2D4.2                                         |
|    |                   |      |    |   | 55 | 68 | IHC LA Clone IG5.2                                         |
|    |                   |      |    |   | 55 | 68 | IHC pp65 clone 2 and 6                                     |
|    |                   |      |    |   | 0  | 68 | IHC CCH2+DDG9                                              |
|    |                   |      |    |   | 0  | 91 | IHC IEA monoclonal MCA 2147                                |
|    |                   |      |    |   | 0  | 91 | IHC pp65 clone 26                                          |
| 33 | Baumgarten et al. | 2014 | 70 | N | 0  | 91 | IHC CCH2/DDG9                                              |
|    |                   |      |    |   | 0  | 10 | qPCR                                                       |
|    |                   |      |    |   | 43 | 67 | Chemiluminescent microparticle immunoassay (CMIA) IgG/IgM) |
|    |                   |      |    |   | 0  | 17 | Real Time PCR gB                                           |
|    |                   |      |    |   | 0  | 17 | Real Time PCR UL123 IE1                                    |
| 34 | Priel et al.      | 2014 | 86 | N | 0  | 19 | Real Time PCR gB blood                                     |
|    |                   |      |    |   | 0  | 19 | qPCR UL123 blood                                           |
|    |                   |      |    |   | 15 | 18 | ELISA IgG                                                  |
|    |                   |      |    |   | 0  | 18 | ELISA IgM                                                  |
|    |                   |      |    |   | 5  | 20 | PCR HCMV miRNA UL112                                       |
| 35 | Mohammad et al.   | 2014 | 51 | P | 13 | 20 | ELISA IgG                                                  |
|    |                   |      |    |   | 1  | 20 | ELISA IgM                                                  |
| 36 | Ahani et al.      | 2014 | 20 | P | 12 | 16 | Real Time PCR                                              |
|    |                   |      |    |   | 33 | 36 | IHC IE1-72                                                 |
|    |                   |      |    |   | 26 | 36 | IHC LA                                                     |
|    |                   |      |    |   | 28 | 36 | IHC pp65                                                   |
| 37 | Shamran et al.    | 2015 | 57 | P | 10 | 11 | Nested PCR IE1                                             |
|    |                   |      |    |   | 10 | 10 | Nested PCR gB                                              |
|    |                   |      |    |   | 10 | 11 | Nested PCR pp65                                            |
| 38 | Hashida et al.    | 2015 | 75 | N | 0  | 39 | qPCR gB                                                    |
|    |                   |      |    |   | 0  | 39 | qPCR IE                                                    |
| 39 | Leher et al.      | 2015 | 79 | N | 0  | 14 | Reverse Transcription PCR blood                            |
|    |                   |      |    |   | 14 | 24 | IHC IE1-72                                                 |
| 40 | Wakefield et al.  | 2015 | 63 | P | 12 | 24 | IHC pp65                                                   |
|    |                   |      |    |   | 13 | 16 | ISH IE pp65                                                |
|    |                   |      |    |   | 0  | 2  | IHC CCH2/DDG9 (only GBM)                                   |
| 41 | Sardi et al.      | 2015 | 88 | N | 0  | 2  | RT PCR DNA                                                 |
|    |                   |      |    |   | 2  | 2  | ELISA IgG/IgM                                              |
| 42 | Huang et al.      | 2015 | 41 | P | 25 | 25 | IHC IE2-86 (only GBM)                                      |

|    |                           |      |    |   |     |     |                                                           |
|----|---------------------------|------|----|---|-----|-----|-----------------------------------------------------------|
|    |                           |      |    |   | 25  | 25  | RT qPCR IE2-86                                            |
|    |                           |      |    |   | 25  | 25  | WB                                                        |
|    |                           |      |    |   | 30  | 43  | IF IE1                                                    |
|    |                           |      |    |   | 1   | 2   | IF late                                                   |
| 43 | Bianchi et al.            | 2015 | 26 | P | 2   | 6   | IE1-68-72 IF positive                                     |
|    |                           |      |    |   | 17  | 34  | Nested PCR gB(UL55)                                       |
|    |                           |      |    |   | 0   | 8   | pPCR UL55 in blood                                        |
|    |                           |      |    |   | 100 | 125 | PCR HCMV IE DNA                                           |
|    |                           |      |    |   | 35  | 126 | PCR HCMV IE RNA                                           |
|    |                           |      |    |   | 29  | 42  | ELISA IgG                                                 |
| 44 | Rahbar et al.             | 2015 | 53 | P | 7   | 42  | ELISA IgM                                                 |
|    |                           |      |    |   | 10  | 12  | Flow cytometry analysis<br>IE specific T-cells in blood   |
|    |                           |      |    |   | 10  | 12  | Flow cytometry analysis<br>pp65 specific T-cells in blood |
| 45 | Dominguez-Valentin et al. | 2016 | 30 | P | 33  | 108 | qPCR pp65                                                 |
|    |                           |      |    |   | 12  | 100 | qPCR pp65 blood                                           |
|    |                           |      |    |   | 18  | 27  | ELISA IgG                                                 |
| 46 | Taha et al.               | 2016 | 92 | N | 0   | 32  | IHC CCH2/DDG9                                             |
|    |                           |      |    |   | 0   | 32  | Real Time PCR                                             |
|    |                           |      |    |   | 0   | 30  | IHC IEA 86-72                                             |
|    |                           |      |    |   | 0   | 30  | IHC pp65                                                  |
|    |                           |      |    |   | 0   | 30  | CISH IE1                                                  |
| 47 | Holdhoff et al.           | 2016 | 76 | N | 0   | 30  | CISH pp65                                                 |
|    |                           |      |    |   | 0   | 25  | Real Time PCR DNA US17                                    |
|    |                           |      |    |   | 4   | 38  | Real Time PCR DNA US17 blood                              |
|    |                           |      |    |   | 8   | 15  | ELISA IgG                                                 |
| 48 | Stangherlin et al.        | 2016 | 61 | P | 4   | 10  | IHC HCMV clone CMV 01 (only<br>GBM)                       |
|    |                           |      |    |   | 2   | 10  | ISH RNA                                                   |
|    |                           |      |    |   | 9   | 10  | qPCR pp65 (UL83)                                          |
| 49 | Lin et al.                | 2016 | 81 | N | 0   | 45  | ddPCR UL55                                                |
| 50 | Malekpour et al.          | 2016 | 86 | N | 20  | 199 | qPCR                                                      |
| 51 | Strong et al.             | 2016 | 91 | N | 0   | 323 | NGS RNA                                                   |
|    |                           |      |    |   | 0   | 110 | IHC CCH2/DDG9                                             |
| 52 | Garcia-Martinez et al.    | 2017 | 73 | N | 0   | 30  | Nested PCR                                                |
|    |                           |      |    |   | 3   | 122 | RT-qPCR                                                   |
| 53 | Johnson et al.            | 2017 | 77 | N | 0   | 5   | NGS RNA                                                   |
|    |                           |      |    |   | 0   | 9   | IHC IE1/2 68-72                                           |
| 54 | Yang et al.               | 2017 | 96 | N | 0   | 9   | ISH DNA Early                                             |
|    |                           |      |    |   | 0   | 116 | Nested PCR UL144                                          |
|    |                           |      |    |   | 9   | 116 | qPCR UL73                                                 |
| 55 | Strojnik et al.           | 2017 | 90 | N | 0   | 33  | RT/PCR (UL55)                                             |
|    |                           |      |    |   | 40  | 158 | IHC IE1 CCH2/DDG9                                         |
|    |                           |      |    |   | 65  | 172 | qPCR gB                                                   |
| 56 | Bahador et al.            | 2017 | 24 | P | 26  | 159 | qPCR pp65                                                 |
|    |                           |      |    |   | 18  | 130 | qPCR gB blood                                             |
|    |                           |      |    |   | 12  | 119 | qPCR pp65 blood                                           |
|    |                           |      |    |   | 38  | 48  | ELISA IgG                                                 |

|    |                    |      |    |   |     |     |                                                           |
|----|--------------------|------|----|---|-----|-----|-----------------------------------------------------------|
| 57 | Basset et al.      | 2017 | 69 | N | 1   | 21  | IHC IE1                                                   |
|    |                    |      |    |   | 7   | 21  | IHC pp65                                                  |
| 58 | Han et al.         | 2018 | 39 | P | 33  | 68  | IF gB                                                     |
|    |                    |      |    |   | 29  | 68  | IF gH                                                     |
|    |                    |      |    |   | 78  | 95  | IHC IE1-72 (only GBM)                                     |
| 59 | Han et al.         | 2017 | 38 | P | 65  | 95  | IHC pp65 clones 2 and 6                                   |
|    |                    |      |    |   | 30  | 95  | Nested PCR HCMV DNA                                       |
|    |                    |      |    |   | 65  | 95  | ELISA IgG                                                 |
|    |                    |      |    |   | 19  | 95  | ELISA IgM                                                 |
| 60 | Hu et al.          | 2017 | 40 | P | 25  | 25  | IHC IE86                                                  |
| 61 | Liang et al.       | 2017 | 43 | P | 23  | 23  | IHC IE86                                                  |
|    |                    |      |    |   | 0   | 7   | IHC IE1                                                   |
| 62 | Zavala-Vega et al. | 2017 | 67 | P | 7   | 7   | Nested PCR IE1                                            |
|    |                    |      |    |   | 5   | 7   | Semi nested PCR IE1                                       |
|    |                    |      |    |   | 3   | 7   | PCR gB                                                    |
| 63 | Xing et al.        | 2016 | 66 | P | 40  | 43  | IHC pp65                                                  |
|    |                    |      |    |   | 28  | 43  | ISH DNA pp65                                              |
|    |                    |      |    |   | 11  | 14  | IHC IE1                                                   |
| 64 | Chen et al.        | 2017 | 27 | P | 11  | 14  | IHC pp65                                                  |
|    |                    |      |    |   | 9   | 14  | Nested PCR UL55                                           |
|    |                    |      |    |   | 13  | 14  | ELISA IgG                                                 |
|    |                    |      |    |   | 2   | 14  | ELISA IgM                                                 |
|    |                    |      |    |   | 0   | 20  | RT PCR DNA                                                |
| 65 | Ahn et al.         | 2018 | 22 | P | 20  | 20  | ELISA IgG                                                 |
|    |                    |      |    |   | 0   | 20  | ELISA IgM                                                 |
| 66 | Al-Sherify et al.  | 2019 | 23 | P | 8   | 14  | Nested PCR gB                                             |
| 67 | Deshpande et al.   | 2018 | 28 | P | 7   | 7   | RT PCR RNA UL112-3p                                       |
| 68 | Meng et al.        | 2018 | 49 | P | 21  | 21  | Flow cytometry analysis<br>pp65 specific T-cells in blood |
| 69 | Liu et al.         | 2018 | 45 | P | 107 | 151 | Flow cytometry analysis<br>pp65 specific T-cells in blood |
| 70 | Adnan et al.       | 2019 | 68 | N | 1   | 112 | Nested PCR gB                                             |
| 71 | Foster et al.      | 2019 | 34 | P | 97  | 188 | ELISA IgG                                                 |
|    |                    |      |    |   | 0   | 42  | IHC IE1                                                   |
| 72 | Loit et al.        | 2019 | 82 | N | 1   | 28  | qPCR tissue                                               |
|    |                    |      |    |   | 6   | 31  | PCR blood                                                 |
|    |                    |      |    |   | 32  | 47  | ELISA IgG                                                 |
|    |                    |      |    |   | 2   | 47  | ELISA IgM                                                 |
| 73 | Nikolova et al.    | 2019 | 84 | N | 1   | 10  | PCR tissue                                                |
|    |                    |      |    |   | 0   | 10  | PCR blood                                                 |
| 74 | Frey et al.        | 2020 | 35 | P | 12  | 44  | HCMV IgG                                                  |
| 75 | Goerig et al.      | 2020 | 37 | P | 12  | 44  | RT PCR DNA                                                |
|    |                    |      |    |   | 23  | 44  | ELISA IgG                                                 |
| 76 | Idriss et al.      | 2020 | 42 | P | 1   | 9   | Nested PCR (GBM)                                          |
|    |                    |      |    |   | 0   | 82  | IHC IE1 8B1.2                                             |
|    |                    |      |    |   | 0   | 82  | IHC LA 2D4.2                                              |
| 77 | Liman et al.       | 2020 | 44 | P | 0   | 82  | IHC LA 1G5.2                                              |
|    |                    |      |    |   | 0   | 82  | ISH RNA                                                   |
|    |                    |      |    |   | 55  | 82  | qPCR                                                      |

|    |                 |      |    |   |    |     |                        |
|----|-----------------|------|----|---|----|-----|------------------------|
| 78 | Maleki et al.   | 2020 | 47 | P | 16 | 45  | IHC pp65 clone 2 and 6 |
|    |                 |      |    |   | 44 | 45  | RT PCR pp65            |
| 79 | Weathers et al. | 2020 | 64 | P | 61 | 65  | pp65 T-cells blood     |
| 80 | Yuan et al.     | 2020 | 97 | N | 0  | 111 | NGS RNA                |
| 81 | Ursu et al.     | 2021 | 62 | P | 16 | 69  | RT PCR pp65            |
|    |                 |      |    |   | 69 | 103 | ELISA IgG              |

HCMV; human cytomegalovirus; n; number, P; positive, N; negative, ELISA; RT; Reverse Transcription; IHC; immunohistochemistry; NGS; Next-Generation Sequencing; ISH; in situ hybridisation.
